# Supplementary material for: Improving precision of glomerular filtration rate estimating model by ensemble learning
Source: J Transl Med. 2017 Nov 9;15:231. doi: 10.1186/s12967-017-1337-y (PMC5679185; doi:10.1186/s12967-017-1337-y)
Supplement: Supplementary file 2 — Additional file 2: Item S1. ANN model calculator. Open the excel worksheet and change the covariate values to estimate GFR. [file 12967_2017_1337_MOESM2_ESM.xls]

## Sheet: Sheet1
				normalization				hidden layer 1				hidden layer 2				output layer			anti-normalization
Serum Creatinine	Age	Gender(male=1,femal=0)					input		output		input		output		input		output
0.848416	40	1		SC after normalization		neuron 1	-0.678676		-0.590658		-6.93343		-0.999998		0.726952		0.726952		91.4464
				-0.483604		neuron 2	-6.99521		-0.999998		0.259635		0.253954
						neuron 3	0.967421		0.747569		-0.37028		-0.354236
estimated GFR				Age after normalization		neuron 4	11.1857		1		1.82399		0.949235
91.4464				-1.04515		neuron 5	0.0593417		0.0592721		-3.08904		-0.99586
						neuron 6	-1.61091		-0.923295		1.27651		0.855551
				sex
				1
				parameters for normalization					weights from hidden 1 to hidden 2 layer								parameters for anti-normalization
				SC mean	1.7057				0.379504	-0.0977287	-1.96387	-2.19433	-2.78322	-3.14553	5.11696		GFR mean	69.9739
				SC std	1.77269				0.242075	3.21614	-1.01504	2.97695	0.265296	-0.808848	1.66866		GFR std	29.5378
									0.243246	-4.92082	1.27287	-2.91168	-0.351053	2.94083	-0.115069
				Age mean	55.6617				-1.40282	-1.2127	0.0641153	-0.110734	0.86391	-0.228969	-1.95721
				Age std	14.9851				-3.93248	-0.887954	0.249456	-0.619382	0.834955	3.34624	0.00199857
									1.61147	2.56063	0.464583	-0.391869	0.108785	0.436419	-1.94994
				weights from input to hidden 1 layer
									weight from hidden 2 to output layer
				-0.526779	1.55277	-0.178404	0.412566
				3.95558	5.08272	3.27609	-5.06876		0.217964	1.17154	-1.14569	-1.10639	1.5931	-0.72633	-0.766741
				-0.543155	-0.797654	-1.20267	-0.132151
				8.2337	3.63212	-5.0865	-0.607653
				1.70417	2.95936	0.181179	-0.0243148
				-4.23872	-6.44215	0.00927423	-0.477949
