# Supplementary material for: Improving precision of glomerular filtration rate estimating model by ensemble learning
Source: J Transl Med. 2017 Nov 9;15:231. doi: 10.1186/s12967-017-1337-y (PMC5679185; doi:10.1186/s12967-017-1337-y)
Supplement: Supplementary file 3 — Additional file 3: Item S2. SVM model calculator. Open the excel worksheet and change the covariate values to estimate GFR. [file 12967_2017_1337_MOESM3_ESM.xls]

## Sheet: Sheet1
				normalization
Serum Creatinine	Age	Gender(male=1,female=0)
6.9457	66	1		Age after normalization		svm result		anti-normalization
				0.689909		-1.51909		25.1033
estimated GFR				Gender				parameters for anti-normalization
25.1033				0
				1				gfr_mu	69.9739
								gfr_sigma	29.5378
				SC after normalization
				2.95596
				parameters for normalization				support vectors					RBF output		coefficients		result
								-1.04515	1	0	-0.662282		0.385902		-8192		-3161.31
				SC mean	1.7057			-1.31209	1	0	-0.592087		0.375994		8192		3080.14
				SC std	1.77269			0.156044	1	0	-0.502748		0.472637		8192		3871.84
								1.55744	0	1	2.73516		0.958724		-8192		-7853.87
				Age mean	55.6617			1.15704	1	0	2.93682		0.889855		-8192		-7289.69
				Age std	14.9851			0.156044	0	1	2.89087		0.984901		-8192		-8068.31
								0.689909	0	1	2.95596		1		-8192		-8192
								-0.244355	0	1	2.61775		0.949397		-8192		-7777.46
								-0.511288	1	0	4.53535		0.731759		-8192		-5994.57
								1.02357	0	1	4.38858		0.892425		-117.873		-105.193
								1.15704	1	0	1.11174		0.744101		-8192		-6095.68
								-0.578021	0	1	1.51632		0.824005		-8192		-6750.25
								0.0225774	0	1	2.26677		0.952745		-8192		-7804.88
								-0.644754	0	1	2.87875		0.910272		-8192		-7456.95
								-0.578021	0	1	1.76264		0.8526		-8192		-6984.5
								0.0893106	1	0	1.95408		0.837804		-8192		-6863.29
								-0.311088	0	1	1.34147		0.827116		-8192		-6775.73
								-0.0441558	1	0	2.29549		0.855141		-7184.83		-6144.04
								1.22377	0	1	1.85198		0.923949		-8192		-7568.99
								0.48971	0	1	1.99812		0.95088		-8192		-7789.61
								-0.511288	0	1	1.88389		0.872537		-8192		-7147.82
								1.89111	0	1	0.046051		0.593754		-8192		-4864.04
								1.49071	0	1	0.984114		0.788006		-8192		-6455.35
								0.28951	1	0	3.95848		0.846625		-8192		-6935.55
								1.49071	0	1	1.05112		0.798847		-8192		-6544.15
								-1.24535	0	1	4.30052		0.7467		-5781.52		-4317.06
								-2.11288	0	1	3.43456		0.653603		-3588.68		-2345.57
								0.48971	0	1	3.48753		0.983172		-8192		-8054.15
								-0.311088	1	0	1.41103		0.75318		-8192		-6170.05
								1.35724	0	1	2.95596		0.976848		-8192		-8002.34
								0.689909	0	1	2.3593		0.981449		-8192		-8040.03
								-1.04515	1	0	1.21065		0.654572		-8192		-5362.25
								0.756642	1	0	2.86662		0.899556		6305.55		5672.19
								1.62417	0	1	0.789482		0.746174		-8192		-6112.66
								-1.31209	0	1	2.87938		0.80967		-8192		-6632.82
								-0.911687	0	1	4.32796		0.791411		-8192		-6483.24
								1.09031	0	1	1.41677		0.875423		-8192		-7171.47
								-1.11189	0	1	2.5233		0.83476		-87.192		-72.7844
								-0.511288	1	0	0.927958		0.672046		-8192		-5505.4
								1.22377	1	0	1.59034		0.803896		-8192		-6585.51
								1.02357	0	1	1.8992		0.937446		-2760.88		-2588.17
								1.55744	1	0	0.328746		0.60179		-8192		-4929.87
								0.0893106	0	1	0.728221		0.75577		-8192		-6191.27
								-0.911687	0	1	1.0441		0.720947		-8192		-5906
								-1.24535	1	0	2.08873		0.710519		-8192		-5820.57
								0.222777	1	0	1.73712		0.822983		-8192		-6741.88
								-0.511288	1	0	0.488919		0.605782		-8192		-4962.57
								-1.04515	0	1	1.65607		0.780963		-8192		-6397.65
								-1.97942	0	1	0.926043		0.553478		-8192		-4534.09
								1.22377	0	1	0.843723		0.779059		-8192		-6382.05
								-0.97842	0	1	1.94324		0.818444		-3218.65		-2634.29
								1.22377	1	0	0.601231		0.662427		-8192		-5426.6
								0.28951	1	0	0.103483		0.581805		-8192		-4766.15
								1.29051	1	0	-0.0624325		0.546951		-8192		-4480.62
								1.42397	1	0	0.125818		0.574156		-8192		-4703.49
								1.22377	0	1	0.486366		0.714771		-8192		-5855.4
								-1.57902	1	0	4.48749		0.606916		-692.81		-420.477
								1.89111	0	1	2.49012		0.916393		8192		7507.09
								-0.778221	0	1	3.26227		0.888421		8192		7277.95
								-0.711488	0	1	4.42368		0.805242		-637.25		-513.14
								0.0893106	0	1	1.40592		0.864718		-6978.29		-6034.25
								-0.110889	1	0	3.15761		0.868428		8192		7114.17
								-0.578021	1	0	1.6733		0.758585		-8192		-6214.33
								0.623176	0	1	0.829684		0.78817		-8192		-6456.69
								2.02457	0	1	0.826494		0.71733		1147.44		823.097
								0.956842	1	0	1.50483		0.802751		-8192		-6576.13
								-0.778221	1	0	2.02428		0.767795		-8192		-6289.78
								0.756642	1	0	1.50356		0.805419		-8192		-6597.99
								0.48971	0	1	2.67518		0.993764		5266.74		5233.89
								0.689909	1	0	3.14613		0.898434		8192		7359.97
								0.689909	0	1	1.14365		0.841337		-8192		-6892.23
								0.0893106	1	0	0.0651951		0.569084		-8192		-4661.94
								-1.24535	1	0	0.409151		0.525516		-8192		-4305.02
								-0.778221	1	0	0.799054		0.629215		-8192		-5154.53
								-0.177622	0	1	2.28209		0.938499		8192		7688.19
								0.823375	1	0	2.86662		0.898924		8192		7363.99
								-0.0441558	1	0	1.4206		0.772951		-2199.22		-1699.89
								0.222777	1	0	2.05172		0.852411		8192		6982.95
								0.890109	0	1	0.26557		0.681924		-8192		-5586.32
								0.556443	0	1	1.94132		0.946402		8192		7752.92
								-0.311088	0	1	1.68096		0.870913		8192		7134.52
								-0.377822	0	1	2.02811		0.900099		8192		7373.61
								1.55744	1	0	-0.294715		0.496285		-8192		-4065.56
								0.556443	0	1	2.52203		0.989217		8192		8103.67
								0.0225774	1	0	0.792672		0.687439		-8192		-5631.5
								1.22377	0	1	3.24887		0.980685		8192		8033.77
								1.55744	1	0	-0.167087		0.517981		-8192		-4243.3
								0.689909	0	1	0.374054		0.704234		-8192		-5769.09
								1.49071	0	1	-0.087958		0.593871		-8192		-4864.99
								0.28951	0	1	0.438506		0.710498		-8192		-5820.4
								1.42397	0	1	1.48186		0.867065		8192		7102.99
								-0.911687	0	1	0.741621		0.675138		-8192		-5530.73
								0.0893106	0	1	2.78366		0.979674		8192		8025.49
								-1.24535	0	1	4.59598		0.712857		8192		5839.72
								1.55744	1	0	-0.0643469		0.535466		-8192		-4386.54
								0.623176	0	1	3.00701		0.999629		8192		8188.96
								-1.44555	1	0	0.0881681		0.45948		-8192		-3764.06
								-1.17862	0	1	0.562943		0.615781		-8192		-5044.48
								2.35824	0	1	-0.131351		0.523217		-8192		-4286.19
								-0.97842	1	0	2.88257		0.777333		5520.19		4291.03
								-2.17962	0	1	0.366396		0.455734		-8192		-3733.38
								0.823375	0	1	-0.452335		0.542285		-8192		-4442.4
								-1.51229	0	1	3.47604		0.763899		8192		6257.86
								-0.778221	1	0	1.81625		0.750588		8192		6148.81
								-1.64575	0	1	0.856486		0.595235		-8192		-4876.16
								0.156044	1	0	-0.0241442		0.555807		-8192		-4553.17
								0.956842	1	0	1.16471		0.757509		0.0177107		0.013416
								0.756642	0	1	2.22083		0.971746		8192		7960.55
								-0.377822	0	1	1.10089		0.785859		8192		6437.76
								0.422976	0	1	0.103483		0.649382		-8192		-5319.74
								0.156044	0	1	-0.23473		0.576669		-8192		-4724.08
								-0.444555	1	0	1.50101		0.752582		8192		6165.15
								1.49071	0	1	-0.118589		0.588045		-8192		-4817.27
								0.623176	1	0	-0.202823		0.532447		-8192		-4361.8
								-1.57902	1	0	0.500405		0.499998		-8192		-4095.98
								1.09031	0	1	-0.0177628		0.622771		-8192		-5101.74
								0.623176	1	0	1.07345		0.746888		8192		6118.51
								1.09031	1	0	1.02495		0.733618		8192		6009.8
								0.0225774	0	1	0.438506		0.699926		-8192		-5733.79
								0.48971	0	1	-0.163258		0.598169		-8192		-4900.2
								-0.911687	1	0	1.60311		0.714342		7800.65		5572.33
								-0.177622	0	1	3.70131		0.933505		8192		7647.28
								-0.0441558	1	0	0.256637		0.596423		-8192		-4885.9
								0.890109	0	1	0.66313		0.75682		8192		6199.87
								1.15704	1	0	-0.528273		0.4699		-8192		-3849.42
								-0.177622	0	1	-0.0120196		0.604753		-8192		-4954.13
								-1.24535	0	1	-0.0337163		0.51317		-8192		-4203.89
								0.48971	1	0	0.225368		0.606833		-1279.9		-776.685
								0.0225774	0	1	0.288543		0.671877		-8192		-5504.02
								1.89111	1	0	-0.215586		0.491554		-8192		-4026.81
								2.09131	0	1	-0.0981682		0.552148		-3363.9		-1857.37
								1.95784	0	1	0.14241		0.605956		8192		4963.99
								0.28951	0	1	0.0862537		0.643003		-8192		-5267.48
								0.422976	0	1	2.0498		0.954146		8192		7816.36
								0.823375	0	1	-0.170916		0.597366		-8192		-4893.62
								0.823375	0	1	-0.0726427		0.616679		-8192		-5051.83
								-0.0441558	0	1	0.220901		0.655852		-8192		-5372.74
								2.09131	1	0	-0.23473		0.475211		-8192		-3892.93
								0.956842	0	1	0.5706		0.73857		8192		6050.37
								0.890109	1	0	0.73524		0.69301		8192		5677.14
								2.15804	1	0	0.0817867		0.520432		8192		4263.38
								-0.110889	0	1	0.219625		0.652088		-8192		-5341.91
								1.22377	1	0	0.224091		0.598846		8192		4905.74
								0.0893106	0	1	-0.315773		0.55877		-8192		-4577.45
								0.956842	1	0	-0.464459		0.484649		-8192		-3970.25
								-0.711488	0	1	2.04342		0.863205		8192		7071.38
								0.890109	0	1	0.0141441		0.632976		-8192		-5185.34
								1.29051	0	1	-0.279399		0.56577		-8192		-4634.79
								1.55744	0	1	-0.324069		0.545807		-8192		-4471.25
								-1.11189	0	1	1.25915		0.724547		8192		5935.49
								-1.44555	0	1	1.27128		0.67763		8192		5551.15
								0.623176	0	1	1.00453		0.81829		8192		6703.43
								-0.444555	1	0	4.90228		0.689248		7016.83		4836.34
								0.890109	0	1	0.0269068		0.635475		-8192		-5205.81
								0.556443	1	0	0.256637		0.612995		8192		5021.65
								1.35724	0	1	0.141772		0.644037		8192		5275.95
								0.623176	0	1	-0.087958		0.614101		-8192		-5030.71
								1.02357	1	0	0.691847		0.683386		8192		5598.3
								-0.177622	0	1	0.556561		0.710056		8192		5816.78
								1.02357	0	1	-0.13518		0.601423		-8192		-4926.86
								-1.97942	0	1	0.843723		0.54364		1611.41		876.028
								1.02357	0	1	-0.0528604		0.61752		-8192		-5058.72
								0.689909	1	0	-0.110931		0.548841		-8192		-4496.11
								1.55744	0	1	0.243874		0.652802		8192		5347.75
								1.42397	1	0	0.765871		0.67988		8192		5569.58
								0.890109	1	0	-0.361719		0.503447		-8192		-4124.24
								-2.37982	0	1	2.023		0.581907		-207.448		-120.715
								0.823375	0	1	0.548266		0.736491		8192		6033.33
								-1.51229	1	0	0.0664714		0.449573		-8192		-3682.9
								1.09031	0	1	2.2789		0.967978		8192		7929.68
								0.356243	0	1	-0.164535		0.595682		-8192		-4879.83
								-0.911687	0	1	-0.0611562		0.541321		-8192		-4434.5
								1.02357	0	1	-0.139009		0.600674		-8192		-4920.72
								-0.911687	0	1	-0.036907		0.545487		-8192		-4468.63
								-0.110889	1	0	-0.281314		0.501488		-8192		-4108.19
								-2.17962	0	1	0.157725		0.429565		-8192		-3519
								1.29051	1	0	-0.321517		0.50198		-8192		-4112.22
								0.823375	0	1	-0.287695		0.574441		-8192		-4705.82
								-0.444555	1	0	0.0269068		0.535706		-8192		-4388.5
								-1.11189	0	1	1.11812		0.705796		8192		5781.88
								1.02357	0	1	-0.292162		0.570751		-8192		-4675.59
								1.15704	0	1	-0.130075		0.599044		-8192		-4907.37
								1.22377	1	0	-0.298544		0.507976		-8192		-4161.34
								0.756642	0	1	-0.100721		0.611591		-8192		-5010.15
								0.623176	0	1	-0.144114		0.603056		-8192		-4940.24
								1.29051	0	1	-0.14539		0.591614		-8192		-4846.5
								1.29051	1	0	0.116246		0.577909		8192		4734.23
								0.0893106	0	1	-0.0688139		0.606394		-8192		-4967.58
								1.55744	1	0	0.361291		0.607194		8192		4974.13
								-0.97842	0	1	-0.275571		0.498728		-8192		-4085.58
								0.823375	1	0	-0.334279		0.508868		-8192		-4168.64
								0.823375	1	0	-0.339384		0.507968		-8192		-4161.28
								0.28951	0	1	-0.240473		0.579345		-8192		-4746
								-1.91268	0	1	0.160916		0.464306		-8192		-3803.59
								-0.0441558	0	1	-0.209204		0.573898		-8192		-4701.37
								1.15704	0	1	-0.228348		0.579939		-8192		-4750.86
								-0.644754	0	1	-0.0190391		0.571643		-8192		-4682.9
								-0.911687	1	0	0.537417		0.57822		8192		4736.78
								-0.444555	1	0	-0.116036		0.512071		-8192		-4194.89
								1.22377	1	0	-0.543589		0.465625		-8192		-3814.4
								-1.11189	0	1	-0.0573274		0.522899		-8192		-4283.59
								-1.77922	0	1	2.20296		0.704332		8192		5769.89
								1.29051	0	1	-0.250683		0.571302		-8192		-4680.11
								-1.17862	0	1	-0.0388214		0.519233		-8192		-4253.56
								0.556443	0	1	0.186441		0.667383		8192		5467.2
								0.556443	0	1	0.777357		0.778339		8192		6376.15
								-1.44555	0	1	-0.368739		0.439865		-8192		-3603.38
								1.89111	1	0	-0.336194		0.471805		-8192		-3865.03
								-1.24535	1	0	-0.454887		0.400861		-8192		-3283.85
								0.689909	0	1	0.244512		0.679286		8192		5564.71
								-1.17862	1	0	0.878821		0.597028		8192		4890.86
								1.42397	1	0	-0.566562		0.455567		-8192		-3732
								0.422976	0	1	0.423829		0.711057		8192		5824.98
								0.689909	1	0	-0.236006		0.526701		-8192		-4314.73
								0.623176	0	1	-0.274932		0.577349		-8192		-4729.64
								0.756642	0	1	-0.307478		0.570966		-8192		-4677.35
								-1.04515	0	1	-0.132628		0.516789		-8192		-4233.54
								1.22377	0	1	0.00138129		0.622404		8192		5098.74
								1.09031	0	1	-0.228348		0.581708		-8192		-4765.35
								0.623176	0	1	-0.391074		0.554608		-8192		-4543.35
								-0.0441558	0	1	-0.176021		0.58024		-8192		-4753.33
								1.55744	0	1	0.425743		0.686374		8192		5622.78
								1.22377	0	1	-0.0432884		0.613758		8192		5027.91
								0.756642	1	0	0.492109		0.653936		8192		5357.04
								0.0225774	1	0	-0.213033		0.518476		-8192		-4247.36
								0.0225774	1	0	-0.229625		0.515609		-8192		-4223.87
								0.0225774	0	1	-0.0815766		0.60125		-8192		-4925.44
								1.22377	0	1	-0.209842		0.581488		-2210.06		-1285.12
								0.356243	1	0	0.0224398		0.569095		8192		4662.03
								-0.511288	0	1	-0.0592418		0.574586		-8192		-4707.01
								1.22377	0	1	0.26557		0.673195		8192		5514.81
								-0.578021	0	1	1.35168		0.802567		8192		6574.63
								1.29051	0	1	-0.113484		0.597773		8192		4896.96
								1.29051	1	0	-0.139009		0.533647		8192		4371.64
								-0.778221	0	1	0.0205254		0.567442		-8192		-4648.48
								-0.177622	0	1	0.00776268		0.608487		-8192		-4984.73
								1.22377	0	1	-0.33045		0.558167		-8192		-4572.5
								1.55744	0	1	-0.354062		0.540162		-8192		-4425.01
								0.890109	1	0	-0.298544		0.514563		-8192		-4215.3
								1.89111	1	0	-0.349595		0.469616		-6167.62		-2896.41
								1.15704	1	0	-0.41979		0.488659		-8192		-4003.09
								1.42397	0	1	-0.458078		0.526538		-8192		-4313.4
								-0.644754	1	0	-0.319602		0.466145		-8192		-3818.66
								1.49071	0	1	-0.514872		0.513048		-8192		-4202.89
								1.15704	1	0	-0.381502		0.49531		-8192		-4057.58
								-0.911687	0	1	-0.285781		0.502735		-8192		-4118.4
								0.422976	1	0	0.0294594		0.571531		8192		4681.99
								0.890109	1	0	-0.578048		0.465687		-8192		-3814.91
								1.09031	1	0	-0.445315		0.485709		-8192		-3978.93
								0.356243	0	1	-0.181126		0.592438		-8192		-4853.25
								-2.04615	1	0	-0.0796622		0.373935		-8192		-3063.27
								-1.11189	0	1	-0.389159		0.467971		-8192		-3833.62
								-1.31209	1	0	1.64778		0.666286		8192		5458.21
								1.15704	1	0	-0.413408		0.489766		-8192		-4012.16
								0.623176	0	1	-0.355976		0.561469		-8192		-4599.55
								0.823375	0	1	-0.336832		0.564818		-8192		-4626.99
								1.62417	1	0	-0.139009		0.519464		8192		4255.45
								-0.177622	0	1	0.181974		0.641245		8192		5253.08
								-1.04515	0	1	-0.349595		0.480421		-8192		-3935.61
								-0.0441558	0	1	-0.247493		0.566584		-8192		-4641.45
								-0.177622	1	0	-0.215586		0.509729		-8192		-4175.7
								1.09031	1	0	-0.413408		0.49126		-8192		-4024.4
								1.22377	0	1	-0.346404		0.555089		-8192		-4547.29
								-0.110889	0	1	-0.146667		0.582705		-8192		-4773.52
								-1.57902	1	0	0.680998		0.522978		8192		4284.24
								0.823375	0	1	0.22473		0.674817		8192		5528.1
								-0.97842	0	1	0.23494		0.585171		8192		4793.72
								1.09031	0	1	-0.0247824		0.621403		8192		5090.54
								0.28951	1	0	-0.341937		0.503729		-8192		-4126.55
								-0.177622	0	1	-0.258979		0.55808		-8192		-4571.79
								0.556443	1	0	0.789482		0.702562		8192		5755.39
								1.09031	0	1	-0.119865		0.602863		8192		4938.65
								1.42397	0	1	-0.478499		0.522679		-8192		-4281.79
								0.756642	1	0	-0.477222		0.484123		-8192		-3965.93
								1.55744	0	1	-0.196441		0.569893		8192		4668.56
								0.0893106	1	0	0.0524323		0.566875		8192		4643.84
								-0.444555	0	1	0.251531		0.636094		8192		5210.88
								0.623176	0	1	-0.387245		0.555356		-8192		-4549.48
								0.28951	0	1	-0.16964		0.593154		-8192		-4859.11
								1.02357	0	1	-0.0758334		0.613029		8192		5021.93
								-1.04515	0	1	-0.349595		0.480421		-8192		-3935.61
								1.09031	1	0	-0.436381		0.487262		-8192		-3991.65
								0.0225774	1	0	-0.279399		0.507013		-8192		-4153.45
								-0.578021	0	1	-0.0432884		0.57251		-8192		-4690
								1.15704	0	1	-0.552523		0.517392		-8192		-4238.47
								1.69091	0	1	-0.204099		0.561038		8192		4596.02
								-0.97842	1	0	1.13727		0.653387		8192		5352.55
								0.422976	0	1	-0.285781		0.573203		-8192		-4695.68
								0.823375	0	1	-0.304925		0.571065		-8192		-4678.16
								-0.110889	1	0	-0.00308567		0.549089		8192		4498.14
								-0.177622	0	1	-0.202823		0.568687		-8192		-4658.68
								0.0893106	0	1	-0.45042		0.532957		-8192		-4365.99
								0.356243	1	0	-0.680788		0.44631		-8192		-3656.17
								0.48971	0	1	-0.303011		0.570771		-8192		-4675.76
								0.156044	1	0	0.357462		0.621663		8192		5092.66
								1.15704	0	1	-0.417875		0.543236		-8192		-4450.19
								1.15704	0	1	-0.329174		0.560378		-8192		-4590.62
								0.956842	0	1	-0.302372		0.569961		-8192		-4669.12
								-0.97842	0	1	-0.225158		0.507282		-8192		-4155.65
								1.35724	0	1	-0.100721		0.597571		8192		4895.3
								1.02357	0	1	-0.461269		0.537896		-8192		-4406.44
								0.689909	1	0	-0.527635		0.475436		-8192		-3894.77
								0.422976	0	1	-0.430638		0.544973		-8192		-4464.41
								0.48971	0	1	-0.336832		0.564157		-8192		-4621.57
								1.35724	1	0	-0.566562		0.457813		-8192		-3750.41
								2.02457	1	0	-0.0771097		0.505204		8192		4138.63
								-0.778221	0	1	0.395112		0.632344		8192		5180.16
								0.222777	0	1	-0.362357		0.553957		-8192		-4538.01
								-0.311088	0	1	0.15262		0.627461		8192		5140.16
								0.890109	0	1	-0.365548		0.558549		-8192		-4575.63
								-1.04515	1	0	-0.479775		0.41294		-8192		-3382.8
								1.49071	0	1	0.563581		0.715491		8192		5861.3
								0.222777	0	1	-0.617613		0.504997		-8192		-4136.94
								-0.177622	1	0	-0.530188		0.456555		-8192		-3740.09
								0.156044	1	0	0.018611		0.563253		8192		4614.17
								-1.71249	0	1	0.0894443		0.479127		8192		3925
								-0.778221	0	1	-0.428724		0.488721		-8192		-4003.6
								0.890109	0	1	-0.05988		0.618461		8192		5066.44
								0.222777	0	1	-0.575495		0.513009		-8192		-4202.57
								-2.04615	0	1	0.046051		0.432074		8192		3539.55
								1.22377	0	1	-0.258341		0.5721		8192		4686.65
								0.48971	0	1	-0.10774		0.609068		8192		4989.48
								-0.844954	0	1	-0.260255		0.512727		-8192		-4200.26
								-0.578021	0	1	-0.452973		0.498667		-8192		-4085.08
								0.756642	0	1	-0.509767		0.531513		-8192		-4354.16
								0.222777	0	1	-0.315135		0.563098		-8192		-4612.9
								-0.0441558	0	1	-0.534017		0.512216		-8192		-4196.08
								1.35724	1	0	-0.554437		0.459871		-8192		-3767.27
								-0.644754	0	1	-0.0177628		0.571871		8192		4684.77
								-1.51229	0	1	-0.266637		0.448723		-8192		-3675.94
								-0.778221	1	0	0.554647		0.593403		8192		4861.15
								-0.177622	0	1	0.0907206		0.62412		8192		5112.79
								0.623176	0	1	-0.426171		0.547761		-8192		-4487.26
								1.29051	1	0	-0.598468		0.454426		-8192		-3722.66
								1.15704	1	0	-0.349595		0.500863		8192		4103.07
								-0.644754	1	0	-0.643138		0.414678		-8192		-3397.04
								-0.711488	1	0	0.22473		0.54833		8192		4491.92
								1.15704	1	0	-0.509129		0.4732		-8192		-3876.45
								-1.17862	0	1	-0.209204		0.491345		-8192		-4025.1
								0.756642	0	1	0.284076		0.686778		8192		5626.09
								1.42397	0	1	-0.250045		0.566096		8192		4637.46
								-0.511288	0	1	-0.451697		0.503237		-8192		-4122.52
								-0.0441558	1	0	-0.148581		0.527023		8192		4317.37
								-0.177622	1	0	-0.451059		0.469843		-8192		-3848.95
								1.75764	0	1	-0.489985		0.504308		-8192		-4131.29
								0.222777	0	1	-0.355976		0.555191		-8192		-4548.12
								1.15704	1	0	-0.534655		0.468801		-8192		-3840.42
								-0.844954	0	1	-0.251321		0.514277		-8192		-4212.96
								0.356243	0	1	0.167297		0.660401		8192		5410.01
								0.28951	0	1	-0.151772		0.596639		8192		4887.66
								1.22377	0	1	-0.483604		0.528728		-8192		-4331.34
								-0.911687	0	1	-0.413408		0.480911		-8192		-3939.62
								0.28951	1	0	-0.615698		0.456285		-8192		-3737.89
								-1.04515	0	1	0.189696		0.57072		8192		4675.34
								0.28951	0	1	-0.413408		0.545757		-8192		-4470.84
								1.22377	1	0	-0.500195		0.473076		-8192		-3875.44
								1.02357	0	1	-0.483604		0.53358		-8192		-4371.09
								0.556443	1	0	-0.541036		0.472659		-8192		-3872.02
								0.0225774	0	1	0.00138129		0.617178		8192		5055.92
								0.689909	0	1	-0.441486		0.544905		-8192		-4463.86
								0.356243	0	1	-0.355976		0.558321		-8192		-4573.76
								-0.244355	0	1	0.18006		0.636846		8192		5217.04
								1.62417	0	1	-0.445315		0.519741		-8192		-4257.72
								0.890109	0	1	-0.458078		0.540535		-8192		-4428.06
								0.0893106	0	1	-0.151772		0.590383		8192		4836.41
								-0.244355	0	1	-0.329812		0.541291		-8192		-4434.26
								0.556443	1	0	-0.504662		0.478993		-8192		-3923.91
								-1.11189	0	1	-0.195165		0.500043		-8192		-4096.35
								-1.11189	0	1	-0.195165		0.500043		-8192		-4096.35
								0.48971	0	1	-0.468288		0.538554		-8192		-4411.83
								0.156044	0	1	-0.183679		0.586556		8192		4805.07
								1.29051	1	0	-0.29982		0.505737		8192		4142.99
								1.49071	0	1	-0.349595		0.54418		8192		4457.92
								-1.24535	1	0	-0.454249		0.400952		-8192		-3284.6
								-1.04515	0	1	0.250255		0.580755		8192		4757.55
								-0.511288	0	1	-0.583153		0.479636		-8192		-3929.18
								-0.0441558	0	1	-0.359167		0.545299		-8192		-4467.09
								1.29051	1	0	-0.53976		0.464428		-8192		-3804.59
								0.556443	0	1	-0.0496697		0.621192		8192		5088.8
								-0.0441558	0	1	-0.298544		0.556843		-8192		-4561.66
								0.0893106	1	0	-0.442125		0.481165		-8192		-3941.7
								0.0225774	1	0	-0.509129		0.46758		-8192		-3830.42
								0.48971	1	0	-0.496366		0.479877		-8192		-3931.16
								0.890109	1	0	-0.671216		0.449628		-8192		-3683.35
								-0.97842	1	0	-0.441486		0.423693		-8192		-3470.89
								0.156044	0	1	-0.202185		0.582971		8192		4775.7
								0.28951	1	0	-0.464459		0.482384		-8192		-3951.69
								0.48971	0	1	-0.299182		0.57152		8192		4681.89
								-1.24535	0	1	-0.381502		0.457082		-8192		-3744.42
								0.689909	1	0	-0.491899		0.481671		-8192		-3945.84
								-1.84595	0	1	0.123904		0.467606		8192		3830.63
								-1.64575	0	1	-0.541036		0.394477		-8192		-3231.56
								1.02357	1	0	-0.528911		0.472438		-8192		-3870.22
								1.02357	1	0	-0.540398		0.47045		-8192		-3853.93
								0.689909	1	0	0.220901		0.607334		8192		4975.28
								0.422976	1	0	-0.438934		0.489105		-8192		-4006.74
								-1.91268	0	1	-0.281314		0.403519		-8192		-3305.63
								-0.244355	1	0	-0.5053		0.457821		-8192		-3750.47
								0.756642	0	1	-0.33045		0.566465		8192		4640.48
								-0.377822	0	1	-0.0624325		0.583221		8192		4777.75
								0.623176	0	1	-0.464459		0.540308		-8192		-4426.2
								1.55744	0	1	-0.400008		0.53153		8192		4354.29
								0.0893106	1	0	-0.311306		0.503747		8192		4126.7
								0.623176	0	1	-0.454249		0.542294		-8192		-4442.47
								-2.11288	0	1	-0.306201		0.377962		-8192		-3096.27
								-0.911687	0	1	0.321727		0.606576		8192		4969.07
								1.29051	0	1	-0.507215		0.522131		-8192		-4277.3
								-1.84595	0	1	-0.451697		0.38711		-8192		-3171.2
								1.35724	0	1	-0.373206		0.545306		8192		4467.15
								-1.04515	0	1	-0.156239		0.512825		8192		4201.06
								0.623176	1	0	-0.676321		0.449594		-8192		-3683.07
								1.35724	0	1	-0.304925		0.558366		8192		4574.14
								-2.04615	0	1	-0.438934		0.367881		-8192		-3013.68
								0.0893106	0	1	-0.232177		0.57487		8192		4709.33
								0.890109	1	0	-0.445315		0.488791		4717.77		2306.01
								1.02357	0	1	-0.532102		0.524233		-8192		-4294.52
								0.756642	0	1	-0.496366		0.534112		-8192		-4375.44
								-0.711488	1	0	-0.579324		0.420669		-8192		-3446.12
								0.422976	0	1	-0.563371		0.51932		-8192		-4254.27
								-1.71249	0	1	-0.311306		0.421015		-8192		-3448.95
								0.956842	1	0	-0.192613		0.53238		8192		4361.25
								0.956842	1	0	-0.590811		0.46272		-8192		-3790.6
								-0.0441558	1	0	-0.470841		0.471789		-8192		-3864.89
								-0.177622	1	0	-0.464459		0.467587		-8192		-3830.48
								1.22377	1	0	0.155173		0.586955		8192		4808.33
								-1.64575	0	1	-0.33045		0.42526		-8192		-3483.73
								-2.51328	0	1	-0.434467		0.318435		-8192		-2608.62
								-1.37882	0	1	-0.528273		0.421613		-8192		-3453.86
								1.09031	1	0	-0.604212		0.458255		-8192		-3754.03
								-0.311088	0	1	-0.087958		0.582709		8192		4773.55
								0.823375	0	1	-0.381502		0.556087		8192		4555.47
								-0.110889	0	1	-0.413408		0.532123		-8192		-4359.15
								-0.110889	0	1	-0.451697		0.52491		-8192		-4300.06
								-2.44655	0	1	-0.0356307		0.372248		8192		3049.45
								-0.511288	0	1	-0.482327		0.497717		-8192		-4077.3
								-0.110889	0	1	-0.225158		0.567782		8192		4651.27
								1.69091	1	0	-0.273018		0.493453		8192		4042.36
								0.422976	1	0	-0.564647		0.467242		-8192		-3827.65
								-0.578021	0	1	-0.196441		0.54483		8192		4463.25
								1.42397	1	0	-0.579324		0.453413		-8192		-3714.36
								0.156044	0	1	-0.127523		0.597438		8192		4894.21
								0.28951	0	1	-0.266637		0.57425		8192		4704.25
								1.02357	0	1	-0.209842		0.586825		8192		4807.27
								0.156044	0	1	-0.574219		0.511452		-8192		-4189.81
								-0.244355	0	1	-0.521254		0.505656		-8192		-4142.33
								0.823375	1	0	-0.609955		0.46071		-8192		-3774.14
								0.689909	0	1	-0.343213		0.564098		8192		4621.09
								0.222777	0	1	-0.576134		0.512887		-8192		-4201.57
								-1.24535	1	0	-0.553799		0.386684		-8192		-3167.71
								0.890109	0	1	-0.100721		0.610446		8192		5000.77
								0.356243	0	1	-0.511682		0.528165		-8192		-4326.73
								0.0225774	1	0	-0.636757		0.445943		-8192		-3653.16
								-0.444555	1	0	-0.484242		0.451393		-8192		-3697.81
								0.0225774	1	0	-0.6425		0.444975		-8192		-3645.23
								-0.377822	1	0	-0.426171		0.464475		-5587.03		-2595.03
								0.356243	0	1	-0.207928		0.587199		8192		4810.33
								-0.778221	0	1	-0.525721		0.471896		-8192		-3865.77
								-0.244355	1	0	-0.556989		0.449222		-8192		-3680.02
								-0.444555	0	1	-0.551246		0.489337		-8192		-4008.65
								0.356243	0	1	-0.521892		0.526198		-8192		-4310.62
								-0.0441558	0	1	-0.193251		0.576947		8192		4726.35
								-1.91268	0	1	-0.273018		0.40466		3494		1413.88
								0.356243	0	1	-0.400646		0.549641		3922.61		2156.03
								0.0893106	1	0	0.307688		0.610745		8192		5003.22
								0.222777	1	0	-0.704399		0.439804		-8192		-3602.88
								-0.711488	0	1	-0.429362		0.493556		-8192		-4043.21
								-0.778221	0	1	-0.222605		0.524764		8192		4298.87
								0.222777	0	1	-0.561456		0.515686		-8192		-4224.5
								-0.511288	0	1	-0.576134		0.48089		-8192		-3939.45
								1.22377	1	0	-0.606126		0.454933		-8192		-3726.81
								-0.97842	1	0	-0.338108		0.439394		8192		3599.51
								-1.91268	1	0	0.0728528		0.407093		8192		3334.91
								-2.51328	0	1	-0.413408		0.320829		-8192		-2628.23
								0.222777	1	0	-0.586344		0.459922		-8192		-3767.68
								-0.578021	1	0	-0.630375		0.420507		-8192		-3444.8
								0.0225774	1	0	-0.362357		0.492719		8192		4036.36
								-1.17862	0	1	-0.0452028		0.518189		8192		4245.01
								-1.11189	0	1	0.0205254		0.535793		8192		4389.22
								-2.11288	0	1	-0.471479		0.356608		-8192		-2921.34
								0.956842	0	1	-0.345766		0.56149		8192		4599.73
								0.422976	0	1	-0.352147		0.560246		8192		4589.53
								-1.64575	0	1	-0.405113		0.414301		-8192		-3393.96
								-0.778221	1	0	-0.555075		0.420213		-8192		-3442.38
								1.22377	0	1	-0.464459		0.532393		8192		4361.36
								-0.377822	0	1	-0.498281		0.502792		-8192		-4118.87
								-0.644754	0	1	-0.483604		0.488709		-8192		-4003.51
								0.623176	0	1	-0.206014		0.590885		8192		4840.53
								-0.244355	0	1	-0.620165		0.487436		-8192		-3993.08
								-0.97842	1	0	-0.663559		0.39035		-8192		-3197.75
								0.222777	1	0	-0.623994		0.45348		-8192		-3714.91
								1.22377	1	0	-0.407027		0.489152		8192		4007.14
								-1.17862	0	1	-0.619527		0.424819		-8192		-3480.12
								-0.0441558	1	0	-0.664835		0.439052		-8192		-3596.71
								1.15704	0	1	-0.317688		0.562603		8192		4608.85
								1.29051	1	0	-0.470841		0.47623		8192		3901.28
								-0.244355	0	1	-0.549332		0.500468		-8192		-4099.83
								0.689909	0	1	-0.566562		0.520654		-8192		-4265.2
								1.29051	0	1	-0.489347		0.525532		8192		4305.16
								-0.511288	1	0	-0.298544		0.477962		8192		3915.47
								0.0893106	1	0	-0.633566		0.448472		-8192		-3673.88
								1.15704	0	1	-0.438934		0.539178		8192		4416.95
								-1.84595	0	1	-0.241111		0.416492		8192		3411.9
								0.48971	1	0	-0.547417		0.470997		-8192		-3858.41
								-0.110889	0	1	-0.266637		0.559904		8192		4586.74
								-1.11189	1	0	-0.628461		0.386056		-8192		-3162.57
								1.49071	0	1	-0.298544		0.553851		8192		4537.15
								-0.244355	1	0	-0.489985		0.460376		-8192		-3771.4
								-1.37882	1	0	-0.498919		0.383601		-8192		-3142.46
								0.689909	1	0	-0.598468		0.46313		-8192		-3793.96
								1.69091	0	1	-0.470841		0.511512		8192		4190.3
								0.28951	1	0	-0.655901		0.449406		-8192		-3681.53
								1.75764	0	1	-0.477222		0.506643		8192		4150.42
								1.29051	0	1	-0.258341		0.569827		8192		4668.02
								0.623176	1	0	-0.611231		0.460814		-8192		-3774.99
								-0.311088	0	1	-0.534655		0.499772		-8192		-4094.13
								-0.844954	0	1	-0.47786		0.475148		-8192		-3892.41
								0.0225774	1	0	-0.578048		0.455866		-8192		-3734.45
								-0.110889	0	1	-0.479775		0.519631		-8192		-4256.82
								0.0225774	1	0	-0.715248		0.432767		-8192		-3545.23
								-1.91268	1	0	-0.541036		0.3313		-8192		-2714.01
								1.42397	0	1	-0.521892		0.514498		8192		4214.76
								0.222777	1	0	-0.623994		0.45348		-8192		-3714.91
								-2.11288	0	1	-0.273656		0.382186		8192		3130.87
								-0.177622	1	0	-0.534655		0.455807		-8192		-3733.97
								0.0893106	0	1	-0.316411		0.558648		8192		4576.44
								-0.911687	0	1	-0.526997		0.461619		-8192		-3781.58
								0.890109	0	1	-0.433829		0.545246		8192		4466.66
								1.02357	1	0	-0.534655		0.471444		8192		3862.07
								-0.578021	1	0	-0.646329		0.417978		-8192		-3424.08
								0.890109	0	1	-0.407027		0.550462		8192		4509.38
								-0.311088	1	0	-0.384054		0.474879		8192		3890.21
								0.956842	1	0	-0.649519		0.452612		-8192		-3707.79
								0.756642	1	0	-0.470841		0.485239		8192		3975.08
								0.756642	0	1	-0.609317		0.512301		-8192		-4196.77
								0.0225774	0	1	-0.413408		0.537636		8192		4404.31
								0.156044	1	0	-0.394264		0.491362		8192		4025.24
								-0.311088	0	1	-0.509129		0.504461		-8192		-4132.54
								-0.444555	1	0	-0.507215		0.447643		-8192		-3667.09
								-0.97842	1	0	-0.483604		0.417324		-8192		-3418.72
								1.15704	0	1	-0.544227		0.518976		1546.18		802.433
								-0.844954	0	1	-0.507215		0.470115		-8192		-3851.18
								0.623176	1	0	-0.598468		0.463022		-8192		-3793.08
								0.156044	1	0	-0.655901		0.446468		-8192		-3657.47
								-0.244355	1	0	-0.534655		0.452933		-8192		-3710.43
								-0.511288	1	0	-0.607402		0.427848		-8192		-3504.93
								-1.71249	0	1	-0.519339		0.39107		-8192		-3203.65
								-0.97842	0	1	-0.489985		0.462549		-8192		-3789.2
								0.156044	0	1	-0.535293		0.518858		-8192		-4250.48
								-0.844954	1	0	-0.594001		0.409838		-8192		-3357.4
								0.756642	0	1	-0.59464		0.515123		-8192		-4219.89
								0.0225774	0	1	-0.126246		0.592666		8192		4855.12
								1.09031	1	0	-0.553799		0.466928		8192		3825.07
								0.0225774	1	0	-0.586344		0.45446		-8192		-3722.94
								-0.578021	1	0	-0.342575		0.4667		8192		3823.21
								0.156044	1	0	-0.464459		0.479231		8192		3925.86
								1.69091	0	1	-0.387883		0.526849		8192		4315.95
								-0.377822	1	0	-0.611231		0.434094		-8192		-3556.1
								-0.110889	1	0	-0.662282		0.437117		-8192		-3580.87
								0.28951	0	1	-0.336832		0.5606		8192		4592.44
								0.623176	0	1	-0.496366		0.534112		8192		4375.44
								-0.110889	0	1	-0.364272		0.541403		8192		4435.18
								0.556443	1	0	-0.618251		0.459277		-8192		-3762.4
								-2.31308	1	0	-0.446592		0.304674		-8192		-2495.89
								-1.97942	0	1	-0.131351		0.416384		8192		3411.02
								-0.110889	0	1	0.0543468		0.620897		8192		5086.39
								-0.377822	0	1	-0.535931		0.495923		-8192		-4062.6
								-0.97842	1	0	-0.585706		0.401967		-8192		-3292.91
								-0.711488	0	1	-0.541036		0.474001		-8192		-3883.01
								-2.11288	0	1	-0.126246		0.401356		8192		3287.91
								-0.110889	1	0	-0.594001		0.448517		-8192		-3674.25
								0.356243	0	1	-0.489347		0.532472		8192		4362.01
								0.356243	1	0	-0.618251		0.457024		-8192		-3743.94
								-1.51229	0	1	-0.629099		0.394104		-8192		-3228.5
								0.356243	1	0	-0.619527		0.456804		-8192		-3742.14
								0.756642	0	1	-0.368739		0.558973		8192		4579.1
								-1.91268	1	0	-0.496366		0.336754		-8192		-2758.69
								1.22377	0	1	-0.447868		0.535573		8192		4387.42
								0.156044	1	0	-0.53274		0.467485		8192		3829.64
								-0.244355	1	0	-0.285781		0.494663		8192		4052.28
								-0.511288	1	0	-0.345766		0.470242		8192		3852.22
								-0.844954	1	0	-0.623356		0.405352		-8192		-3320.64
								-1.17862	1	0	-0.328536		0.424734		8192		3479.42
								0.0893106	0	1	-0.170916		0.586688		8192		4806.15
								-1.11189	0	1	-0.31003		0.481027		8192		3940.57
								-0.0441558	1	0	-0.496366		0.467451		8192		3829.36
								-1.84595	1	0	-0.423619		0.351965		2404.63		846.348
								-1.64575	0	1	-0.343213		0.423384		8192		3468.36
								-0.911687	1	0	-0.338108		0.444466		8192		3641.07
								-1.97942	0	1	-0.247493		0.400686		8192		3282.42
								0.956842	1	0	-0.592087		0.462499		8192		3788.79
								-0.110889	1	0	-0.47467		0.468606		8192		3838.82
								-0.177622	0	1	-0.468288		0.518743		8192		4249.54
								-2.11288	0	1	-0.355976		0.371513		8192		3043.43
								0.956842	0	1	-0.40958		0.549064		8192		4497.93
								-1.64575	1	0	-0.535931		0.355753		-8192		-2914.33
								0.222777	0	1	-0.521892		0.523248		8192		4286.45
								-0.711488	0	1	-0.547417		0.472888		-8192		-3873.9
								-0.177622	1	0	-0.609317		0.44335		-8192		-3631.92
								-0.578021	0	1	-0.41979		0.504607		8192		4133.74
								-0.511288	1	0	-0.500195		0.445124		8192		3646.45
								0.0893106	0	1	-0.470841		0.52906		8192		4334.06
								0.222777	1	0	-0.547417		0.466605		8192		3822.43
								-2.17962	0	1	-0.445315		0.352879		1510.57		533.047
								0.0893106	1	0	-0.548056		0.463012		8192		3792.99
								0.890109	1	0	-0.56018		0.468783		8192		3840.27
								-0.0441558	0	1	-0.516149		0.515579		8192		4223.62
								-0.311088	0	1	-0.41979		0.520941		8192		4267.55
								0.28951	1	0	-0.65271		0.449951		-8192		-3686
								-0.0441558	1	0	-0.427447		0.47918		8192		3925.44
								-0.911687	0	1	-0.602297		0.448923		-8192		-3677.58
								-1.84595	0	1	-0.523806		0.377128		-7481.52		-2821.49
								0.0225774	1	0	-0.521892		0.465406		8192		3812.6
								-0.844954	0	1	-0.618889		0.451076		-8192		-3695.21
								0.48971	1	0	-0.585706		0.464362		8192		3804.05
								-0.311088	0	1	-0.602297		0.487393		-8192		-3992.73
								0.48971	0	1	-0.57039		0.518821		8192		4250.18
								-0.311088	0	1	-0.215586		0.558895		8192		4578.47
								-0.578021	0	1	-0.585068		0.475158		-8192		-3892.5
								-0.110889	1	0	-0.611231		0.445633		-8192		-3650.63
								-2.17962	1	0	-0.41979		0.320545		5120.02		1641.2
								-0.444555	0	1	-0.445315		0.508541		8192		4165.97
								-1.64575	0	1	-0.153048		0.451411		8192		3697.96
								0.356243	1	0	-0.599745		0.460207		8192		3770.01
								-1.97942	0	1	-0.590173		0.354786		-8192		-2906.41
								0.48971	1	0	-0.60485		0.461053		8192		3776.94
								-0.311088	0	1	-0.477222		0.510335		8192		4180.67
								0.689909	1	0	-0.590173		0.464568		8192		3805.74
								1.22377	0	1	-0.488709		0.527751		8192		4323.34
								0.222777	1	0	-0.687808		0.442617		-8192		-3625.92
								-0.177622	0	1	-0.629737		0.488763		-8192		-4003.95
								1.62417	1	0	-0.641224		0.43529		8192		3565.9
								-0.511288	1	0	-0.640586		0.422535		-8192		-3461.4
								-0.0441558	0	1	-0.349595		0.54712		8192		4482
								0.756642	1	0	-0.547417		0.471881		8192		3865.65
								-0.0441558	1	0	-0.662282		0.439479		-8192		-3600.21
								0.0893106	1	0	-0.653986		0.445017		-8192		-3645.58
								-0.110889	1	0	-0.761194		0.420749		-8192		-3446.78
								0.0225774	1	0	-0.699932		0.435329		-8192		-3566.22
								-1.17862	0	1	-0.355976		0.46738		8192		3828.78
								-0.377822	1	0	-0.706952		0.418576		-8192		-3428.97
								-0.578021	1	0	-0.426171		0.45319		8192		3712.53
								-1.17862	0	1	-0.583791		0.430539		-8192		-3526.98
								-1.37882	1	0	-0.599745		0.3696		-8192		-3027.77
								-1.31209	0	1	-0.373844		0.452021		8192		3702.95
								-1.17862	1	0	-0.586982		0.387087		-8192		-3171.02
								-0.110889	1	0	-0.47786		0.468067		8192		3834.4
								1.09031	1	0	-0.664197		0.44799		5889.39		2638.39
								1.02357	1	0	-0.6425		0.452861		8192		3709.84
								0.48971	1	0	-0.71461		0.4422		-8192		-3622.5
								-0.511288	0	1	-0.536569		0.487972		8192		3997.47
								0.356243	0	1	-0.502748		0.529887		8192		4340.83
								1.82437	1	0	-0.610593		0.430855		8192		3529.56
								-0.377822	1	0	-0.629099		0.431186		-8192		-3532.27
								1.22377	1	0	-0.547417		0.464968		8192		3809.02
								1.35724	1	0	-0.594001		0.453164		8192		3712.32
								-0.711488	0	1	-0.464459		0.487393		8192		3992.73
								-0.0441558	1	0	-0.70759		0.431918		-8192		-3538.27
								0.756642	1	0	-0.639309		0.455965		8192		3735.26
								-0.97842	0	1	-0.266637		0.500243		8192		4097.99
								-2.24635	0	1	-0.300458		0.363753		8192		2979.86
								0.356243	1	0	-0.583153		0.463065		8192		3793.43
								-0.578021	0	1	-0.403836		0.507467		8192		4157.17
								-0.177622	0	1	-0.479775		0.516597		8192		4231.96
								1.22377	1	0	-0.489985		0.474833		8192		3889.83
								-1.11189	0	1	-0.528911		0.445056		1439.83		640.805
								-0.0441558	1	0	-0.556351		0.457291		8192		3746.13
								-0.711488	0	1	-0.607402		0.462461		-8192		-3788.48
								-1.97942	1	0	-0.579324		0.320652		-8192		-2626.78
								1.69091	1	0	-0.605488		0.4382		8192		3589.74
								-1.57902	0	1	-0.458078		0.413179		8192		3384.76
								0.0225774	1	0	-0.548694		0.460847		8192		3775.26
								0.48971	1	0	-0.470841		0.48433		8192		3967.63
								0.28951	1	0	-0.615698		0.456285		8192		3737.89
								0.689909	0	1	-0.438934		0.545403		8192		4467.94
								0.890109	1	0	-0.592725		0.463148		8192		3794.11
								-1.44555	0	1	-0.387883		0.436921		8192		3579.26
								0.222777	0	1	-0.614422		0.505603		8192		4141.9
								0.0893106	0	1	-0.324069		0.557175		8192		4564.38
								-0.377822	0	1	-0.653348		0.474643		-8192		-3888.27
								-0.511288	1	0	-0.711419		0.411253		-8192		-3368.98
								-0.0441558	1	0	-0.509129		0.465286		8192		3811.62
								0.756642	1	0	-0.636757		0.456405		8192		3738.87
								0.48971	0	1	-0.407665		0.550338		8192		4508.37
								-2.17962	1	0	-0.535293		0.307447		-8192		-2518.61
								0.0225774	1	0	-0.547417		0.461064		8192		3777.04
								0.356243	1	0	-0.534655		0.471444		8192		3862.07
								-0.578021	1	0	-0.681426		0.412429		-8192		-3378.62
								0.28951	1	0	-0.716524		0.439088		-8192		-3597.01
								1.15704	1	0	-0.553799		0.465508		8192		3813.44
								-1.17862	0	1	-0.37512		0.464264		8192		3803.25
								1.09031	0	1	-0.590811		0.511648		8192		4191.42
								-0.444555	1	0	-0.427447		0.460689		8192		3773.96
								0.0225774	0	1	-0.410218		0.538244		8192		4409.3
								-0.0441558	0	1	-0.470841		0.524126		8192		4293.64
								0.956842	0	1	-0.541036		0.523618		8192		4289.48
								-0.311088	0	1	-0.541036		0.498601		8192		4084.54
								-2.17962	0	1	-0.438934		0.353685		8192		2897.39
								-0.311088	1	0	-0.617613		0.436211		8192		3573.44
								-0.444555	0	1	-0.56018		0.487725		8192		3995.44
								-0.911687	1	0	-0.589535		0.406027		8192		3326.18
								-0.244355	1	0	-0.702485		0.425231		-8192		-3483.49
								-1.11189	1	0	-0.566562		0.395093		8192		3236.6
								-1.17862	1	0	-0.489985		0.401139		8192		3286.13
								0.48971	0	1	-0.514872		0.529531		8192		4337.92
								-1.17862	1	0	-0.445315		0.407644		8192		3339.42
								0.156044	1	0	-0.638033		0.449502		8192		3682.32
								-1.71249	0	1	-0.413408		0.406273		8192		3328.19
								-0.578021	1	0	-0.713333		0.407402		-8192		-3337.44
								-1.31209	1	0	-0.518701		0.386326		8192		3164.78
								-0.110889	1	0	-0.653986		0.438498		8192		3592.18
								0.422976	0	1	-0.438934		0.543362		8192		4451.22
								0.823375	0	1	-0.509129		0.531264		8192		4352.11
								-0.511288	0	1	-0.451697		0.503237		8192		4122.52
								-0.778221	0	1	-0.486156		0.478745		8192		3921.88
								-1.11189	0	1	-0.485518		0.452148		8192		3703.99
								-0.110889	1	0	-0.751622		0.422325		-8192		-3459.69
								-0.311088	1	0	-0.713333		0.42059		-8192		-3445.47
								-1.31209	0	1	-0.57039		0.42109		8192		3449.57
								-0.511288	0	1	-0.579324		0.48032		8192		3934.78
								1.09031	0	1	-0.579324		0.513842		8192		4209.39
								-0.511288	0	1	-0.553799		0.484885		8192		3972.18
								1.22377	1	0	-0.59783		0.456348		8192		3738.4
								-1.17862	0	1	-0.425533		0.456073		8192		3736.15
								-0.644754	1	0	-0.553799		0.428765		8192		3512.44
								-1.37882	0	1	-0.526997		0.421811		8192		3455.47
								-1.97942	1	0	-0.74524		0.301028		-8192		-2466.02
								-0.110889	1	0	-0.566562		0.453119		8192		3711.95
								-0.377822	0	1	-0.506577		0.501277		8192		4106.46
								-1.37882	1	0	-0.689084		0.357303		-8192		-2927.03
								-0.444555	1	0	-0.581877		0.435503		8192		3567.64
								-0.311088	0	1	-0.593363		0.489024		8192		4006.08
								0.356243	1	0	-0.63548		0.454065		8192		3719.7
								-0.444555	0	1	-0.349595		0.526007		8192		4309.05
								-0.97842	0	1	-0.502748		0.46041		8192		3771.68
								-0.97842	1	0	-0.534655		0.40963		8192		3355.69
								-0.110889	1	0	-0.630375		0.442435		8192		3624.43
								1.42397	1	0	-0.292162		0.502334		8192		4115.12
								-0.97842	1	0	-0.521892		0.41155		8192		3371.42
								0.623176	1	0	-0.705038		0.444668		8192		3642.72
								-2.04615	1	0	-0.496366		0.324367		8192		2657.21
								-0.844954	0	1	-0.606126		0.453242		8192		3712.96
								-0.578021	1	0	-0.592087		0.426593		8192		3494.65
								0.356243	1	0	-0.641862		0.452971		8192		3710.74
								-0.578021	0	1	-0.606126		0.471434		8192		3861.99
								-0.511288	0	1	-0.548056		0.485913		8192		3980.6
								0.222777	0	1	-0.547417		0.518367		8192		4246.46
								-0.644754	0	1	-0.605488		0.467259		8192		3827.79
								0.956842	0	1	-0.521254		0.527432		8192		4320.72
								-0.578021	1	0	-0.606126		0.424359		8192		3476.35
								0.28951	1	0	-0.544227		0.468578		8192		3838.59
								-0.177622	0	1	-0.502748		0.512311		8192		4196.85
								-0.110889	0	1	-0.548056		0.50684		8192		4152.03
								-0.444555	1	0	-0.653986		0.423855		8192		3472.22
								-1.24535	0	1	-0.610593		0.420594		8192		3445.51
								0.0893106	1	0	-0.643138		0.446852		8192		3660.61
								-1.37882	1	0	-0.579324		0.372426		8192		3050.92
								-1.91268	0	1	-0.620165		0.357375		8192		2927.61
								0.0225774	1	0	-0.668664		0.440574		8192		3609.18
								0.823375	0	1	-0.451697		0.542409		8192		4443.42
								-0.844954	0	1	-0.618251		0.451184		8192		3696.1
								-0.177622	0	1	-0.489985		0.514691		8192		4216.35
								0.28951	1	0	-0.515511		0.473539		8192		3879.23
								-0.444555	1	0	-0.606126		0.431577		8192		3535.48
								0.689909	1	0	-0.655901		0.453212		8192		3712.71
								0.422976	1	0	-0.636757		0.454804		8192		3725.76
								-0.844954	0	1	-0.477222		0.475258		8192		3893.31
								0.623176	1	0	-0.586982		0.465012		8192		3809.38
								-1.31209	0	1	-0.579324		0.419695		8192		3438.14
								-0.0441558	1	0	-0.643138		0.442684		8192		3626.47
								-1.44555	1	0	-0.521892		0.374828		8192		3070.59
								-0.177622	0	1	-0.581877		0.497607		8192		4076.4
								0.222777	0	1	-0.649519		0.498949		8192		4087.39
								0.756642	1	0	-0.592087		0.464127		8192		3802.13
								0.48971	1	0	-0.534655		0.473214		8192		3876.57
								0.356243	0	1	-0.422342		0.545433		8192		4468.18
								1.55744	1	0	-0.6425		0.437841		8192		3586.79
								0.0225774	1	0	-0.738859		0.428826		5904.56		2532.03
								0.623176	0	1	-0.394264		0.553985		8192		4538.25
								1.09031	1	0	-0.558266		0.466158		8192		3818.76
								-0.844954	1	0	-0.617613		0.406228		8192		3327.82
								0.48971	0	1	-0.464459		0.539296		8192		4417.92
								-0.911687	1	0	-0.666749		0.394377		8192		3230.73
								-0.0441558	0	1	-0.579324		0.503712		8192		4126.41
								0.356243	1	0	-0.706952		0.441849		8192		3619.63
								-0.97842	0	1	-0.638033		0.437873		8192		3587.06
								0.756642	0	1	-0.553799		0.522995		8192		4284.38
								-0.911687	1	0	-0.672492		0.393514		8192		3223.67
								-1.17862	0	1	-0.62527		0.423902		8192		3472.6
								-0.444555	1	0	-0.565285		0.438194		8192		3589.69
								-0.110889	0	1	-0.572943		0.502195		8192		4113.98
								1.15704	1	0	-0.713333		0.438292		8192		3590.49
								-2.37982	1	0	-0.572943		0.28482		5310.26		1512.47
								0.222777	0	1	-0.413408		0.544097		8192		4457.25
								1.15704	1	0	-0.653986		0.448366		8192		3673.01
								-0.511288	0	1	-0.611231		0.474629		8192		3888.16
								0.0225774	1	0	-0.623994		0.448095		8192		3670.79
								0.422976	1	0	-0.700571		0.443871		8192		3636.19
								0.222777	0	1	-0.502748		0.526916		8192		4316.5
								-1.24535	1	0	-0.629737		0.375878		8192		3079.2
								0.689909	1	0	-0.704399		0.444882		8192		3644.47
								0.556443	1	0	-0.692913		0.446432		8192		3657.17
								1.35724	1	0	-0.41979		0.482856		8192		3955.55
								-0.177622	1	0	-0.655901		0.435621		8192		3568.61
								0.0893106	1	0	-0.668025		0.442646		8192		3626.16
								-0.778221	0	1	-0.513596		0.473993		8192		3882.95
								0.156044	1	0	-0.586344		0.458309		8192		3754.47
								0.422976	1	0	-0.655901		0.451516		8192		3698.82
								-0.444555	1	0	-0.721629		0.413006		8192		3383.34
								-0.511288	1	0	-0.515511		0.442647		8192		3626.16
								-1.51229	1	0	-0.594001		0.359454		8192		2944.65
								-1.91268	0	1	-0.474032		0.377148		8192		3089.6
								-1.57902	1	0	-0.811607		0.325426		-8192		-2665.89
								0.0225774	1	0	-0.656539		0.442612		8192		3625.88
								-1.84595	0	1	-0.743326		0.347127		8192		2843.66
								-1.57902	1	0	-0.681426		0.342352		8192		2804.55
								0.0225774	0	1	-0.636757		0.495412		8192		4058.42
								0.890109	1	0	-0.719715		0.441329		8192		3615.37
								-1.44555	1	0	-0.617613		0.361754		8192		2963.49
								0.756642	1	0	-0.625908		0.458277		8192		3754.21
								-0.177622	0	1	-0.621441		0.490293		8192		4016.48
								-1.51229	1	0	-0.732477		0.340993		8192		2793.42
								-0.444555	0	1	-0.458078		0.50622		8192		4146.95
								-0.644754	1	0	-0.708228		0.404493		8192		3313.61
								-0.110889	1	0	-0.713971		0.428541		8192		3510.61
								-0.644754	1	0	-0.700571		0.405688		8192		3323.39
								-0.177622	1	0	-0.649519		0.436678		8192		3577.26
								-1.91268	1	0	-0.547417		0.330523		8192		2707.64
								0.956842	1	0	-0.704399		0.443217		8192		3630.84
								0.556443	1	0	-0.784167		0.430876		8192		3529.74
								-0.110889	1	0	-0.754812		0.4218		8192		3455.38
								-1.37882	1	0	-0.696742		0.356254		8192		2918.44
								-1.31209	1	0	-0.69036		0.362268		8192		2967.7
								0.0893106	1	0	-0.734392		0.431487		8192		3534.74
								-2.51328	1	0	-0.706952		0.259077		8192		2122.36
								-0.0441558	1	0	-0.705676		0.432237		8192		3540.88
